# Supplementary material for: Preparation and characterization of cellulose nanocrystals from corncob via ionic liquid [Bmim][HSO4] hydrolysis: effects of major process conditions on dimensions of the product
Source: Royal Society of Chemistry journal article supplement (doi:10.1039/d3ra02715e), 2023-01-01
Supplement: d3ra02715e1.pdf [file d3ra02715e1.pdf]

## Supplementary Information

### Preparation and Characterization of Cellulose Nanocrystals from Corncob via Ionic Liquid

#### [Bmim][HSO<sub>4</sub>] Hydrolysis: Effects of Major Process Conditions on Dimensions of the

#### Product

Wanwipa Rasri<sup>1</sup>, Vu Thi Thu<sup>2</sup>, Angelica Corpuz<sup>3</sup>, Loc Thai Nguyen<sup>1</sup>

<sup>1</sup>Department of Food, Agriculture and Bioresources, Asian Institute of Technology, (AIT), 58 Moo 9, Km 42, Paholyothin Highway, Klong Luang, Pathum Thani 12120, Thailand.

<sup>2</sup>University of Science and Technology of Hanoi (USTH), Vietnam Academy of Science and Technology (VAST), 18 Hoang Quoc Viet, Cau Giay, Hanoi, Vietnam.

<sup>3</sup>Department of Chemical Engineering, College of Engineering and Architecture, Cagayan State University, Carig Sur, Tuguegarao City, Cagayan Valley 3500, Philippines.

**Table. S1** Process conditions determined by central composite design (CCD) for BmimHSO<sub>4</sub> hydrolysis of corncob

| Std order | Run order | Parameter        |                  |          | Size (nm)<br>Measured | Size (nm)<br>Predicted |
|-----------|-----------|------------------|------------------|----------|-----------------------|------------------------|
|           |           | Mass percent (%) | Temperature (°C) | Time (h) |                       |                        |
| 17        | 1         | 8                | 100              | 1.5      | 303                   | 317                    |
| 10        | 2         | 1                | 80               | 2        | 209                   | 272                    |
| 4         | 3         | 5                | 46               | 2        | 270                   | 285                    |
| 11        | 4         | 2                | 60               | 2.5      | 263                   | 223                    |
| 1         | 5         | 2                | 100              | 2.5      | 166                   | 161                    |
| 20        | 6         | 2                | 60               | 1.5      | 461                   | 443                    |
| 18        | 7         | 5                | 80               | 2        | 402                   | 379                    |
| 19        | 8         | 8                | 100              | 2.5      | 529                   | 521                    |
| 3         | 9         | 5                | 110              | 2        | 173                   | 200                    |
| 8         | 10        | 5                | 80               | 2        | 499                   | 379                    |
| 15        | 11        | 2                | 100              | 1.5      | 211                   | 151                    |
| 13        | 12        | 5                | 80               | 2.8      | 336                   | 372                    |
| 2         | 13        | 8                | 60               | 2.5      | 343                   | 377                    |
| 9         | 14        | 5                | 80               | 2        | 421                   | 379                    |
| 5         | 15        | 10               | 80               | 2        | 547                   | 512                    |
| 16        | 16        | 5                | 80               | 2        | 358                   | 379                    |
| 12        | 17        | 5                | 80               | 1.2      | 307                   | 386                    |
| 14        | 18        | 5                | 80               | 2        | 333                   | 379                    |
| 7         | 19        | 5                | 80               | 2        | 346                   | 379                    |
| 6         | 20        | 8                | 60               | 1.5      | 424                   | 403                    |

**Table. S2** Coded levels of three variables in CCD matrix

|   | Variables    | Units | Coded levels |     |    |     |            |
|---|--------------|-------|--------------|-----|----|-----|------------|
|   |              |       | - $\alpha$   | -1  | 0  | 1   | + $\alpha$ |
| A | Mass percent | %     | 1            | 2   | 5  | 8   | 10         |
| B | Temperature  | °C    | 46           | 60  | 80 | 100 | 110        |
| C | Time         | h     | 1.2          | 1.5 | 2  | 2.5 | 2.8        |

**Table. S3** Analysis of variance (ANOVA) of the regression equation

| Source                     | Sum of Squares | Degree of freedom | Mean Square | F-value | P-value |                 |
|----------------------------|----------------|-------------------|-------------|---------|---------|-----------------|
| Model                      | 199594         | 7                 | 28513.4     | 8.23    | 0.0009  | significant     |
| A-Mass fraction of corncob | 80324.8        | 1                 | 80324.8     | 23.18   | 0.0004  |                 |
| B-Temperature              | 18029.6        | 1                 | 18029.6     | 5.2     | 0.0416  |                 |
| C-Time                     | 228.89         | 1                 | 228.89      | 0.07    | 0.8015  |                 |
| AB                         | 21218          | 1                 | 21218       | 6.12    | 0.0292  |                 |
| AC                         | 18818          | 1                 | 18818       | 5.43    | 0.038   |                 |
| BC                         | 26450          | 1                 | 26450       | 7.63    | 0.0172  |                 |
| B <sup>2</sup>             | 37655.7        | 1                 | 37655.7     | 10.87   | 0.0064  |                 |
| Residual                   | 41577.2        | 12                | 3464.76     |         |         |                 |
| Lack of Fit                | 22442.3        | 7                 | 3206.05     | 0.84    | 0.5998  | not significant |
| Pure Error                 | 19134.8        | 5                 | 3826.97     |         |         |                 |
| Cor Total                  | 241171         | 19                |             |         |         |                 |

**Std. Dev.** 58.86 **R<sup>2</sup>** 0.8276  
**Mean** 344.95 **Adjusted R<sup>2</sup>** 0.7270  
**C.V. %** 17.06 **Predicted R<sup>2</sup>** 0.5040  
**Adeq Precision** 9.9301



**Table S4 Characteristics of CNC produced by ionic liquid hydrolysis and traditional methods**

| Reagents                                   | Condition<br>(Temp,<br>Time) | Raw material                     | Pretreatment                         | Diameter<br>(nm) | Length<br>(nm) | CNC yield<br>(%) | CrI<br>(%) | Decomposition<br>Temperature<br>(°C) | References |
|--------------------------------------------|------------------------------|----------------------------------|--------------------------------------|------------------|----------------|------------------|------------|--------------------------------------|------------|
| H <sub>2</sub> SO <sub>4</sub>             | 45 °C, 1 h                   | Corncob                          | 3% NaOH, bleaching by NaOCl          | 198              | 5.5            | 35               | 55.9       | 313                                  | 1          |
| H <sub>2</sub> SO <sub>4</sub>             | 45 °C, 1 h                   | Corncob                          | 2% NaOH, bleaching by acetate buffer | 210.8            | 4.15           | 41               | 83.7       | 276                                  | 2          |
| H <sub>2</sub> SO <sub>4</sub>             | 50 °C, 20 min                | Corn stover                      | 2% NaOH, bleaching by acetate buffer | 7                | 356.3          | 64               | 55.04      | -                                    | 3          |
| [Bmim][HSO <sub>4</sub> ]/H <sub>2</sub> O | 100 °C, 12 h                 | Microcrystalline Cellulose (MCC) | N/A                                  | 3.6              | 146            | 48               | 82         | -                                    | 4          |
|                                            | 130 °C, 12 h                 | Softwood pulp                    | Bleaching                            | 7                | 219            | 60               | 78         | -                                    |            |
|                                            | 130 °C, 12 h                 | Hardwood pulp                    | Bleaching                            | 6                | 227            | 56               | 77         | -                                    |            |
| [Bmim][HSO <sub>4</sub> ]                  | 80 - 120 °C, 2 h             | Cotton linter                    | Defatting                            | 50-100           | 500-800        | 33               | 69         | 365                                  | 5          |
| [Bmim][HSO <sub>4</sub> ]                  | 100 °C, 1.5 h                | corncob                          | 2% KOH                               | 52               | 182            | 40               | 63         | 334                                  | This study |

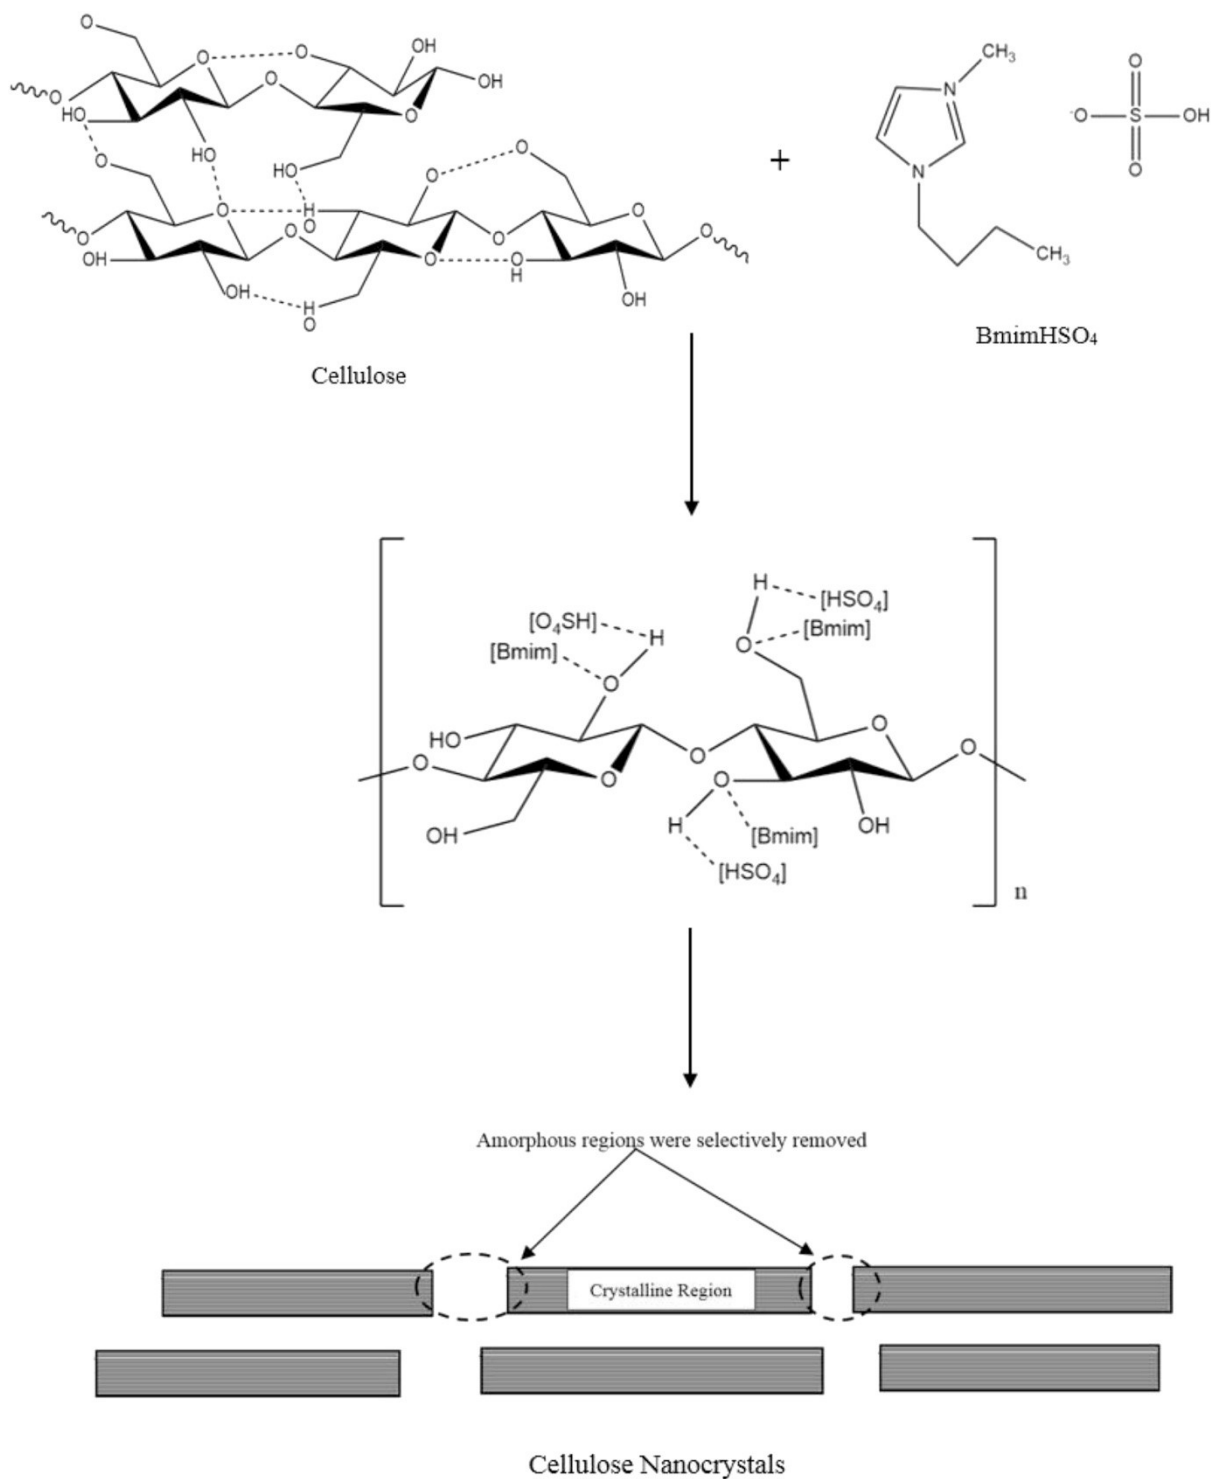

Figure S1. Schematic diagram showing reaction of single cellulose chain repeating unit with [Bmim][HSO<sub>4</sub>]. (Tan, X. Y., Abd Hamid, S. B., & Lai, C. W. (2015). Preparation of high crystallinity cellulose nanocrystals (CNCs) by ionic liquid solvolysis. *Biomass and Bioenergy*, 81, 584-591. Copyright 2015 by Elsevier)

## References

1. C. Liu, B. Li, H. Du, D. Lv, Y. Zhang, G. Yu, X. Mu and H. Peng, *Carbohydr. Polym.*, 2016, **151**, 716–724.
2. H. A. Silvério, W. P. F. Neto, N. O. Dantas and D. Pasquini, *Ind. Crops Prod.*, 2013, **44**, 427–436.
3. L. A. S. Costa, D. de J. Assis, G. V. P. Gomes, J. B. A. Da Silva, A. F. Fonsêca and J. I. Druzian, *Mater. Today: Proc.*, 2015, **2**, 287–294.
4. J. Mao, B. Heck, G. Reiter and M. P. Laborie, *Carbohydr. Polym.*, 2015, **117**, 443–451.
5. J. Huang, S. Hou and R. Chen, *BioResources*, 2019, **14**, 7805–7820.
